# Supplementary material for: N-heterocyclic carbene-stabilized Cu9 clusters with combined thermally activated delayed fluorescence and phosphorescence
Source: Royal Society of Chemistry journal article supplement (doi:10.1039/d4qi00160e), 2024-01-01
Supplement: d4qi00160e1.pdf [file d4qi00160e1.pdf]

*Supporting Information for*

**N-heterocyclic carbene-stabilized Cu<sub>9</sub> Clusters with  
Combined Thermally Activated Delayed Fluorescence  
and Phosphorescence**

Lin-Mei Zhang,<sup>†a</sup> Mo Xie,<sup>†a</sup> Hui-Zhi Wei,<sup>a</sup> Shang-Fu Yuan,<sup>\*a</sup> Dong-Sheng Li<sup>b</sup> and Tao Wu<sup>\*a</sup>

<sup>a</sup>College of Chemistry and Materials Science, Guangdong Provincial Key Laboratory of Functional Supramolecular Coordination Materials and Applications, Jinan University, Guangzhou, Guangdong 510632, China.

<sup>b</sup>College of Materials and Chemical Engineering, Hubei Provincial Collaborative Innovation Centre for New Energy Microgrid, Key Laboratory of Inorganic Nonmetallic Crystalline and Energy Conversion Materials, China Three Gorges University, Yichang 443002, China.

\*Corresponding author E-mails: [sfyuan@jnu.edu.cn](mailto:sfyuan@jnu.edu.cn); [wutao@jnu.edu.cn](mailto:wutao@jnu.edu.cn).

<sup>†</sup>These authors contributed equally to this work.

## I. Experimental section

### Chemicals and materials

Copper powder (Cu, 99%), copper(II) trifluoroacetate hydrate ( $\text{Cu}(\text{CF}_3\text{CO}_2)_2 \cdot \text{H}_2\text{O}$ , 99%), Tert-butyl acetylene ( ${}^t\text{BuC}\equiv\text{CH}$ , 96%), 2-bromopyridine (98%) were purchased from Shanghai Aladdin Biochemical Technology Co., Ltd. Imidazole (99%), phenylacetylene ( $\text{PhC}\equiv\text{CH}$ , 97%), potassium carbonate ( $\text{K}_2\text{CO}_3$ , 99%), magnesium sulfate ( $\text{MgSO}_4$ , 99%), sodium chloride ( $\text{NaCl}$ , 99.9%), sodium carbonate anhydrous ( $\text{Na}_2\text{CO}_3$ , 99%) were purchased from Shanghai Macklin Biochemical Technology Co., Ltd. dichloromethane (DCM, 99%), diethyl ether ( $\text{Et}_2\text{O}$ , 99%), ethanol ( $\text{EtOH}$ , 99%), were purchased by Guangzhou Biohonor Biotechnology Co., Ltd..

### Synthesis of 1,3-di(pyridine-2-yl)-1H-imidazol-3-ium hexafluorophosphate $[\text{H}(\text{py})_2\text{im}](\text{PF}_6)$

**Cation!** *The synthesis of the ligand at elevated temperatures may cause unexpected hazard. It is crucial to follow established safety protocols and maintain a secure laboratory environment.*

1,3-di(pyridin-2-yl)-1H-imidazol-3-ium hexafluorophosphate was synthesized following a previously reported procedure. Imidazole (5.8 g, 84.6 mmol), 2-bromopyridine (2.7 ml, 28.6 mmol) and potassium carbonate (7.8 g, 56.4 mmol) were added into a 200 ml round bottom flask. The mixture was heated to 190°C and stirred for about 19 h. Upon cooling to RT, the resulting solid was dissolved in 200 ml of water, then extracted with 3×200 ml of dichloromethane. The organic phase obtained was then subjected to wash with 3×200 ml of saturated sodium carbonate solution, followed by a wash with 200 ml of saturated aqueous sodium chloride solution. The obtained organic phase was dehydrated with anhydrous magnesium sulfate. After filtration, the obtained solution was rotary evaporated to dryness to obtain 3.3 g of a yellow oil (yield ~79.7%).  ${}^1\text{H}$  NMR ( $d_6$ -DMSO):  $\delta$  = 8.55 (s, 1H), 8.47–8.48 (d, 1H), 7.95–7.99 (m, 2H), 7.79 (d,  $J$  = 7.5 Hz, 1H), 7.34 (dd,  $J$  = 4.4, 3.9 Hz, 1H), 7.13 (s, 1H).

Next, the obtained yellow oil (2.5 g, 17.2 mmol) was combined with 2-bromopyridine (4.1 g, 25.8 mmol) in a 50 ml round bottom flask. The mixture was stirred under N<sub>2</sub> atmosphere at 160°C for 24 hours. After cooling to RT, the crude product was washed with a substantial quantity of Et<sub>2</sub>O, followed by a 10 ml methanol wash. The isolated solid was dissolved in water, and a saturated aqueous solution of ammonium hexafluorophosphate was added dropwise, resulting in the immediate formation of a large amount of white solid. After stirring for 30 min, the obtained solid was filtered by suction, and subsequently vacuum-dried at 50°C overnight. Yield: 4.17 g, 65.9 %. <sup>1</sup>H NMR (d<sub>6</sub>-DMSO, Fig. S1): δ = 10.78 (s, 1H), 8.73 (s, 2H), 8.73 (d, 2H), 8.27 (m, 4H), 7.71 (t, 2H).

## II. Supporting figures

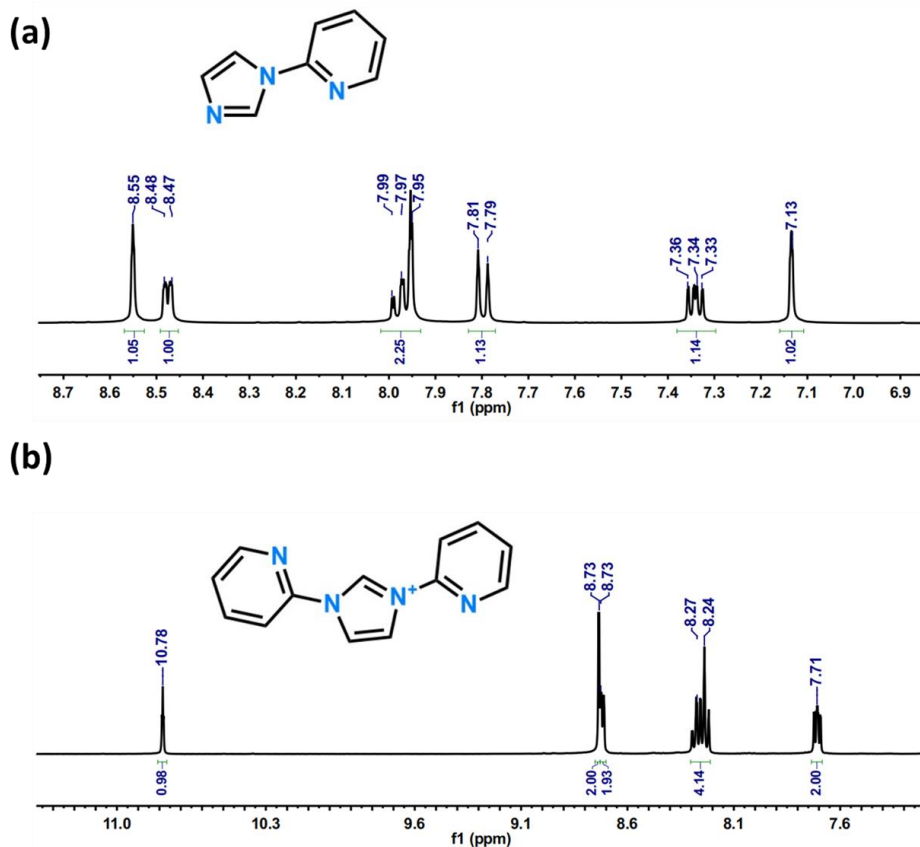

**Figure S1.** <sup>1</sup>H NMR for (a) 2-(1H-imidazol-1-yl)pyridine and (b) [H(py)<sub>2</sub>im](PF<sub>6</sub>).

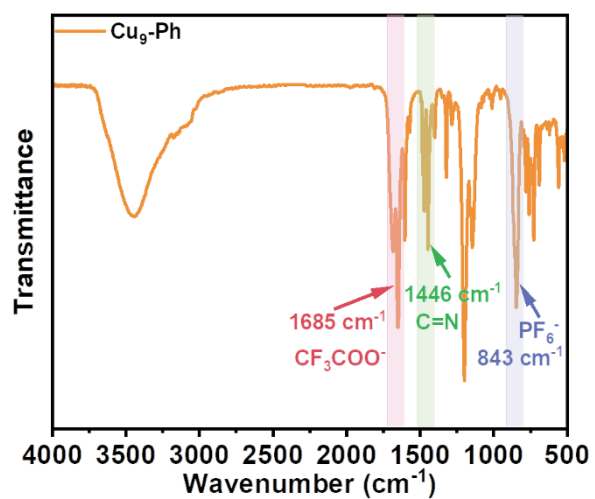

**Figure S2.** FT-IR spectra of **Cu<sub>9</sub>-Ph**.

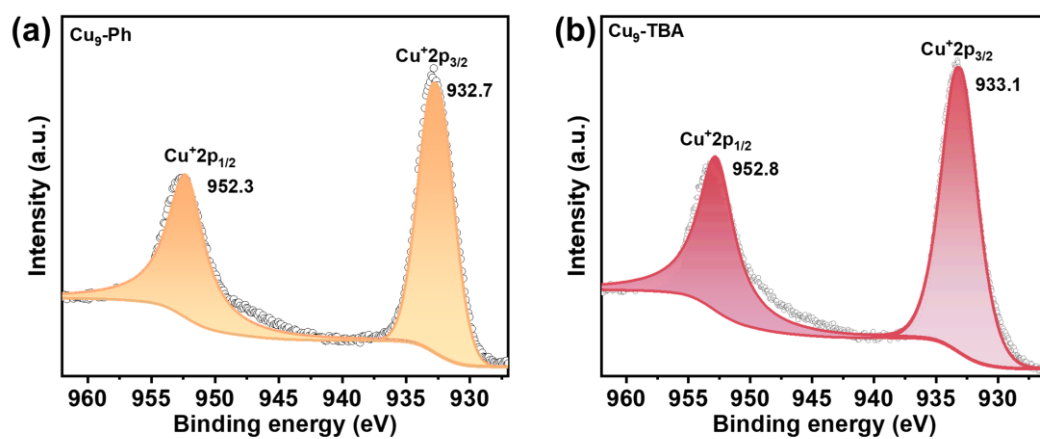

**Figure S3.** (a-b) X-ray photoelectron spectrum of **Cu<sub>9</sub>-Ph**; (c-d) X-ray photoelectron spectrum of **Cu<sub>9</sub>-TBA**.

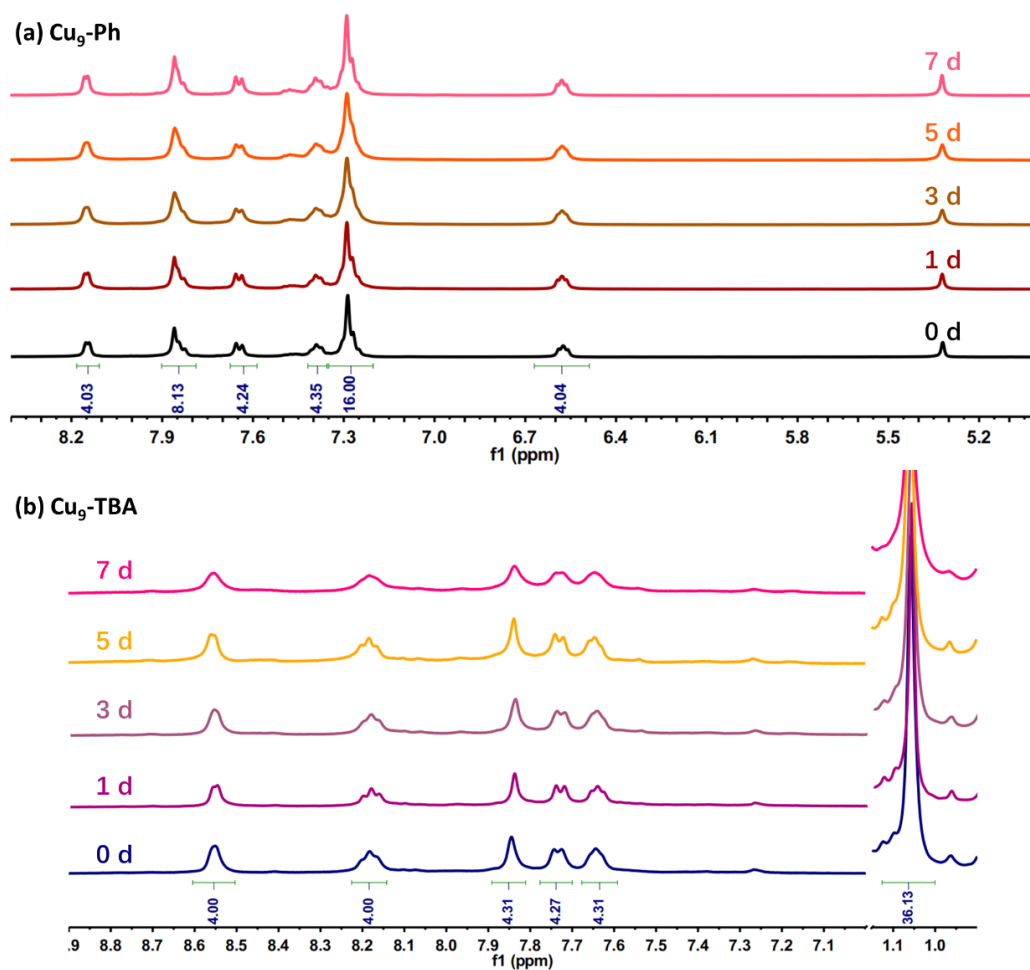

**Figure S4.** Stability check: (a) The  $^1\text{H}$ NMR spectrum of  $\text{Cu}_9\text{-Ph}$  in  $\text{CD}_2\text{Cl}_2$  at room temperature; (b) The  $^1\text{H}$ NMR spectrum of  $\text{Cu}_9\text{-TBA}$  in  $\text{CD}_2\text{Cl}_2$  at room temperature.

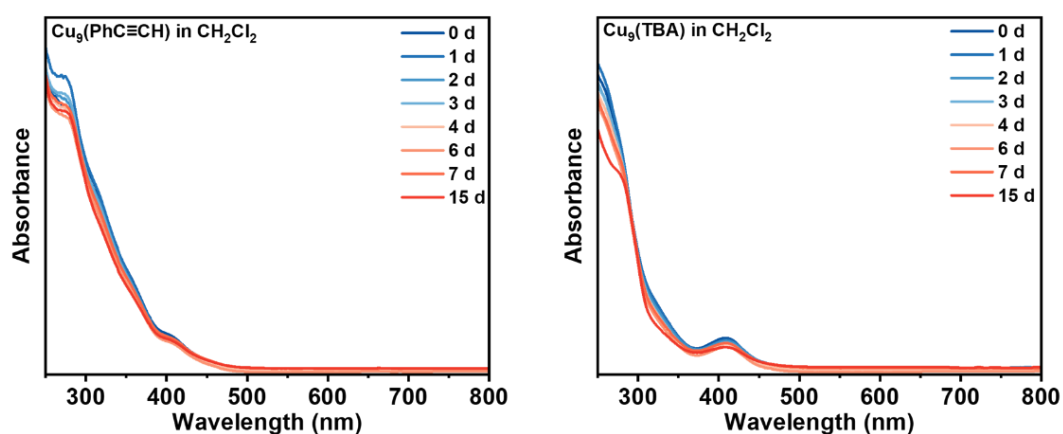

**Figure S5.** Stability check: (a) The UV-vis spectrum of  $\text{Cu}_9\text{-Ph}$  in  $\text{CD}_2\text{Cl}_2$  at room temperature; (b) The UV-vis spectrum of  $\text{Cu}_9\text{-TBA}$  in  $\text{CD}_2\text{Cl}_2$  at room temperature.

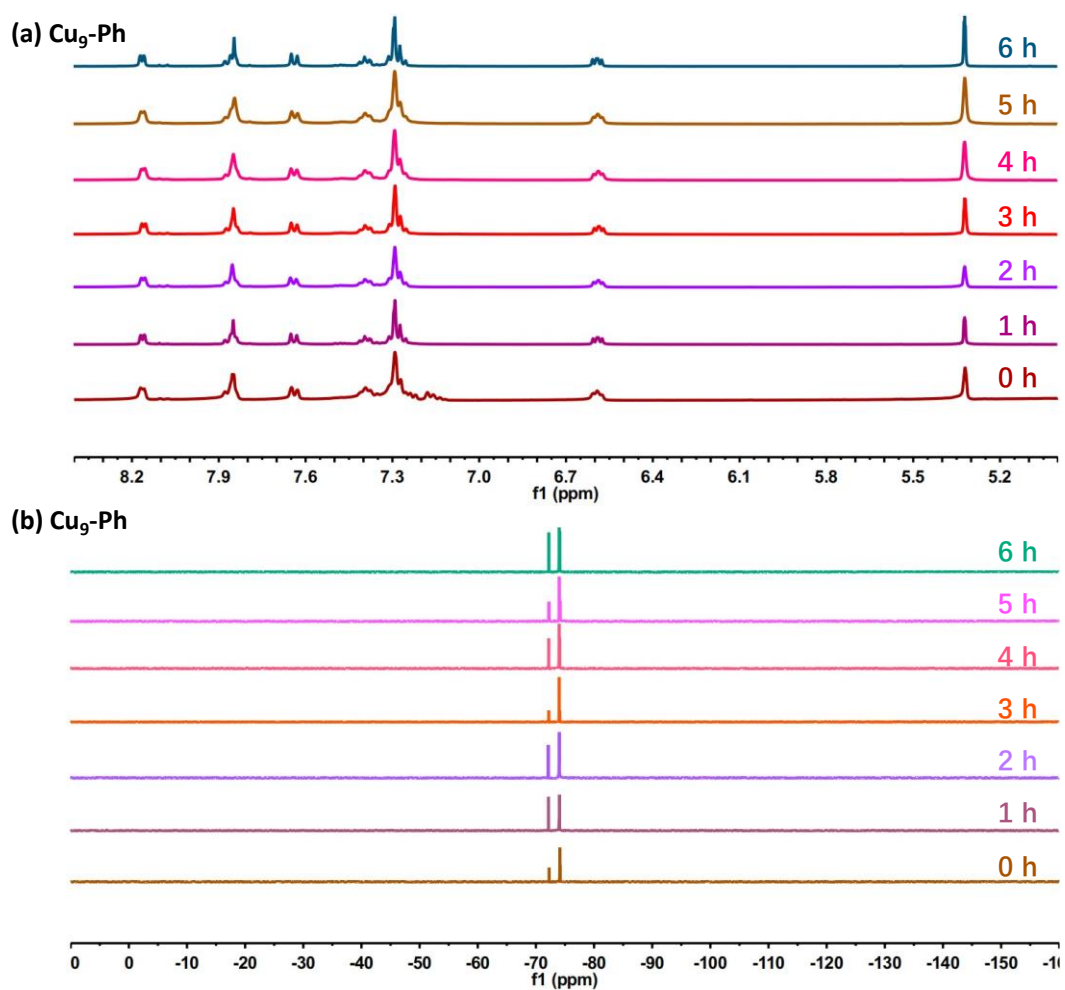

**Figure S6.** Stability check: Place **Cu<sub>9</sub>-Ph** in an oven at 50°C for heating, take a portion of the solid and dissolve it in CD<sub>2</sub>Cl<sub>2</sub> every hour, and then perform (a) <sup>1</sup>H NMR spectrum test and (b) <sup>19</sup>F NMR spectrum.

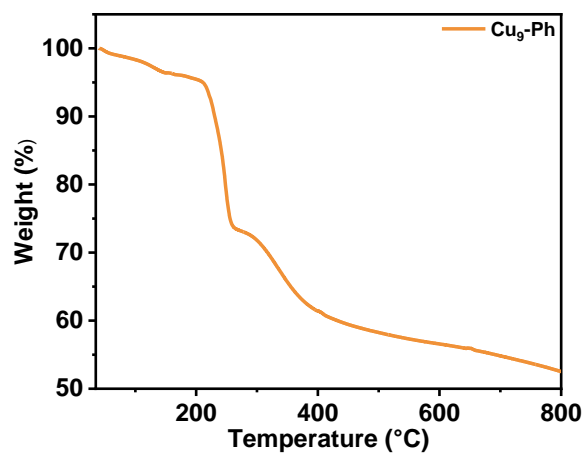

**Figure S7.** TG curves of **Cu<sub>9</sub>-Ph**.

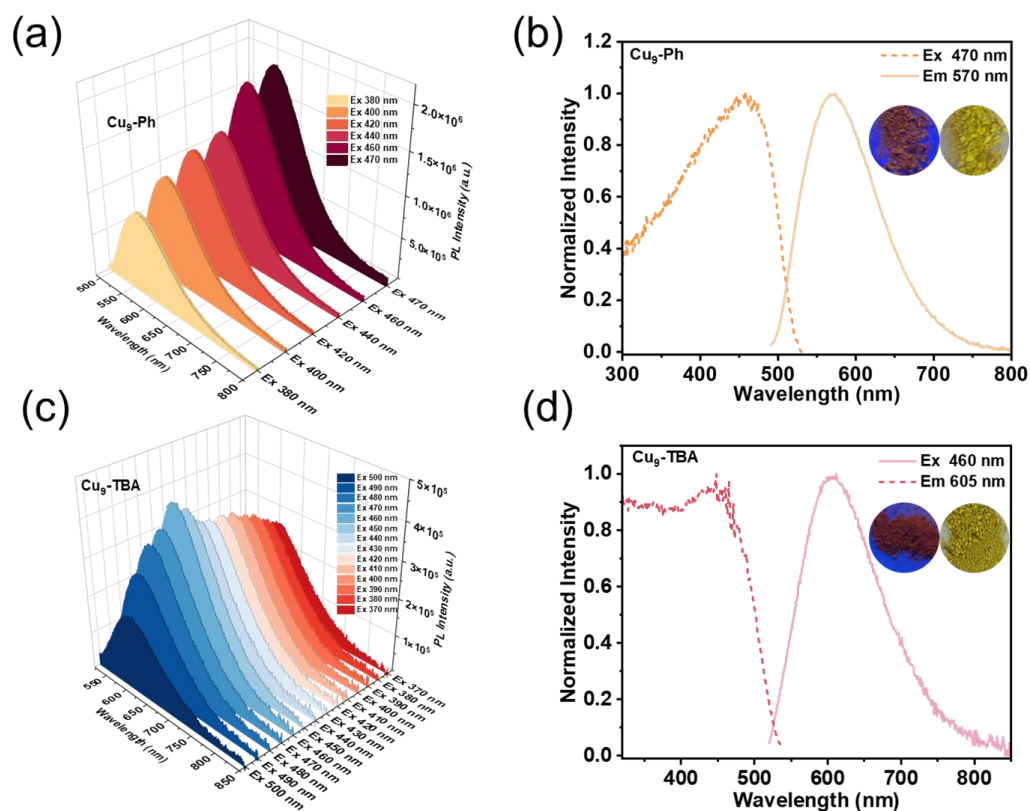

**Figure S8.** (a) Emission spectrum of **Cu<sub>9</sub>-Ph** in the solid state under different excitation wavelengths; (b) Normalized excitation and emission spectra of **Cu<sub>9</sub>-Ph** in the solid state; (c) Emission spectrum of **Cu<sub>9</sub>-TBA** in the solid state under various excitation wavelengths; (d) Normalized excitation and emission spectra of **Cu<sub>9</sub>-TBA** in the solid state.

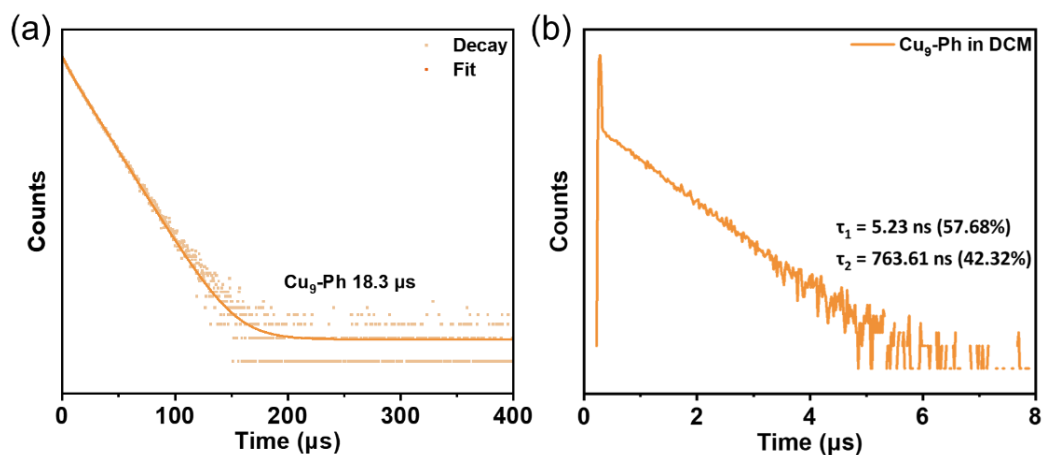

**Figure S9.** (a) The PL decay profiles for **Cu<sub>9</sub>-Ph** crystals under ambient conditions; (b) The PL decay profiles for **Cu<sub>9</sub>-Ph** in DCM under ambient conditions.

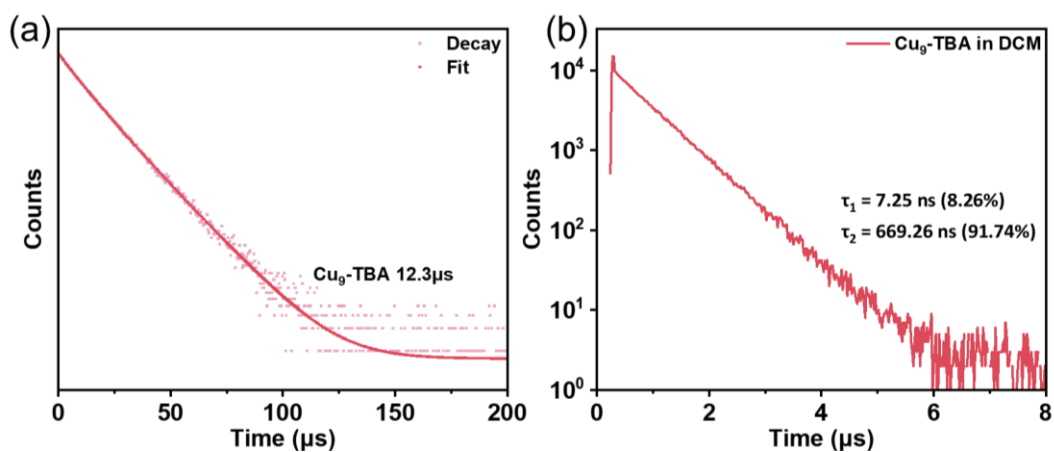

**Figure S10.** (a) The PL decay profiles for  $\text{Cu}_9\text{-TBA}$  crystals under ambient conditions; (b) The PL decay profiles for  $\text{Cu}_9\text{-TBA}$  dissolved in DCM under ambient conditions.

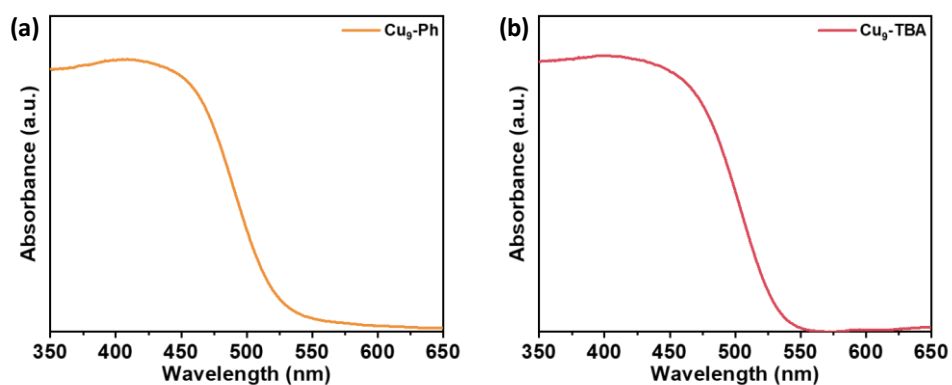

**Figure S11.** (a) UV-vis diffuse reflectance spectra of  $\text{Cu}_9\text{-Ph}$ ; (b) UV-vis diffuse reflectance spectra of  $\text{Cu}_9\text{-TBA}$ .



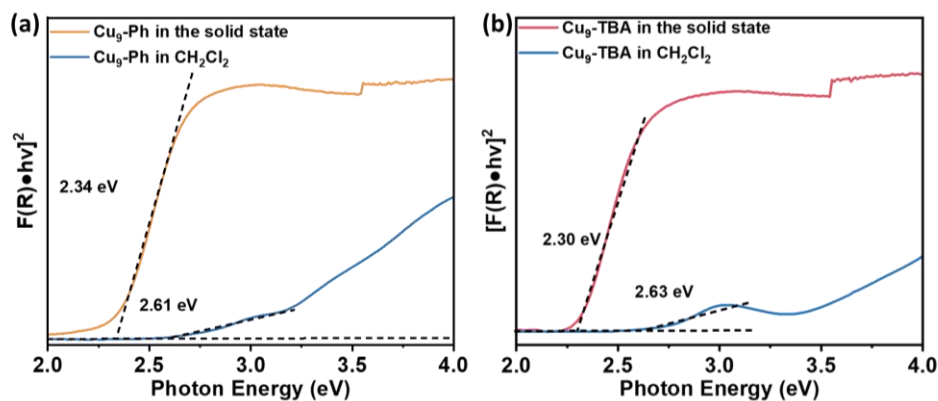

**Figure S12.** (a) UV-vis absorption spectra of **Cu<sub>9</sub>-Ph**; (b) UV-vis absorption spectra of **Cu<sub>9</sub>-TBA**.

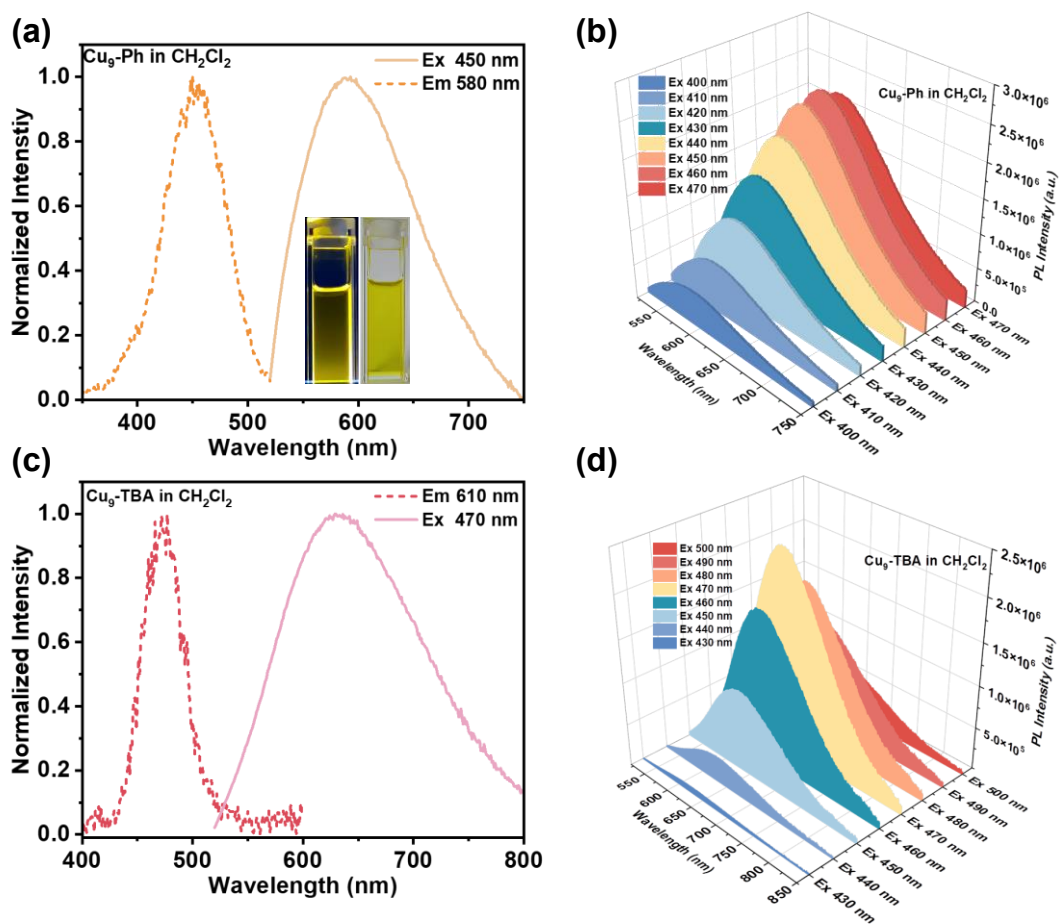

**Figure S13.** (a) Normalized excitation and emission spectra of **Cu<sub>9</sub>-Ph** in DCM; (b) Emission spectrum of **Cu<sub>9</sub>-Ph** in DCM under different excitation wavelengths; (c) Normalized excitation and emission spectra of **Cu<sub>9</sub>-TBA** in DCM; (d) Emission

spectrum of **Cu<sub>9</sub>-TBA** in DCM under different excitation wavelengths.

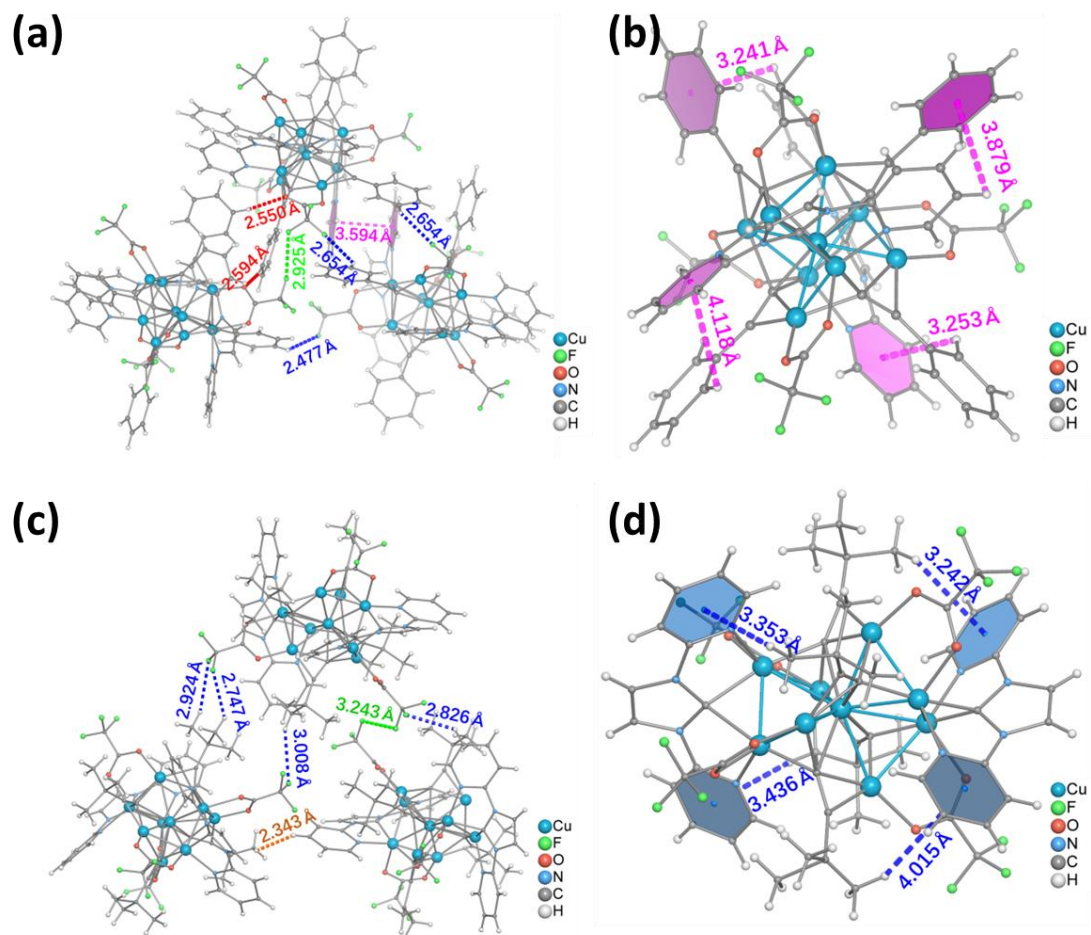

**Figure S14.** The intercluster and intracuster interactions in (a-b) **Cu<sub>9</sub>-Ph** and (c-d) **Cu<sub>9</sub>-TBA**.

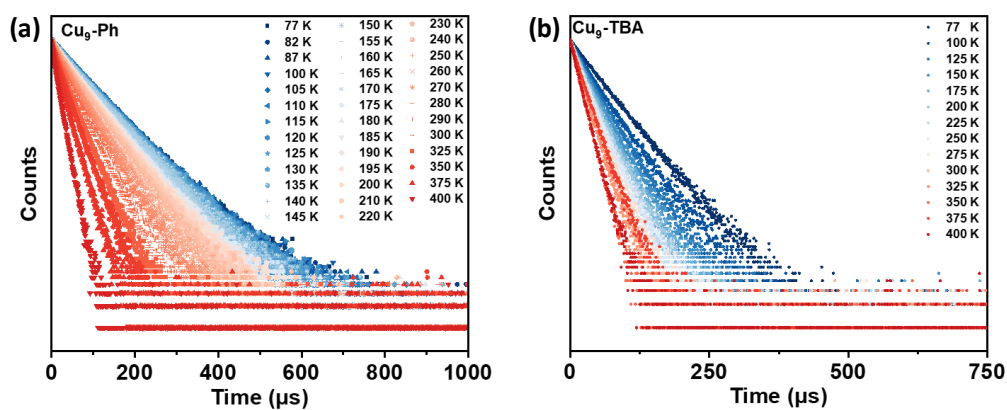

**Figure S15.** (a) Temperature-dependent solid-state of **Cu<sub>9</sub>-Ph** in the range of 77-400 K; (b) Temperature-dependent solid-state of **Cu<sub>9</sub>-TBA** in the range of 77-400 K.

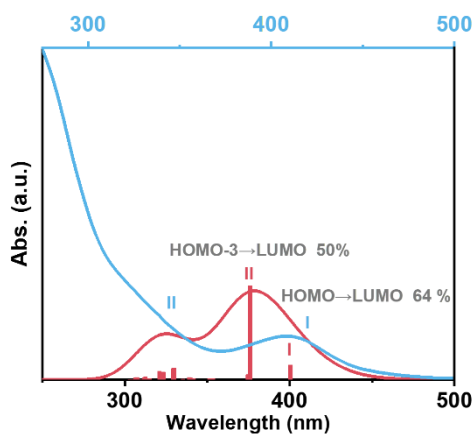

**Figure S16.** Experimental (blue line) and simulated (red line) optical absorption spectra of **Cu<sub>9</sub>-TBA**.

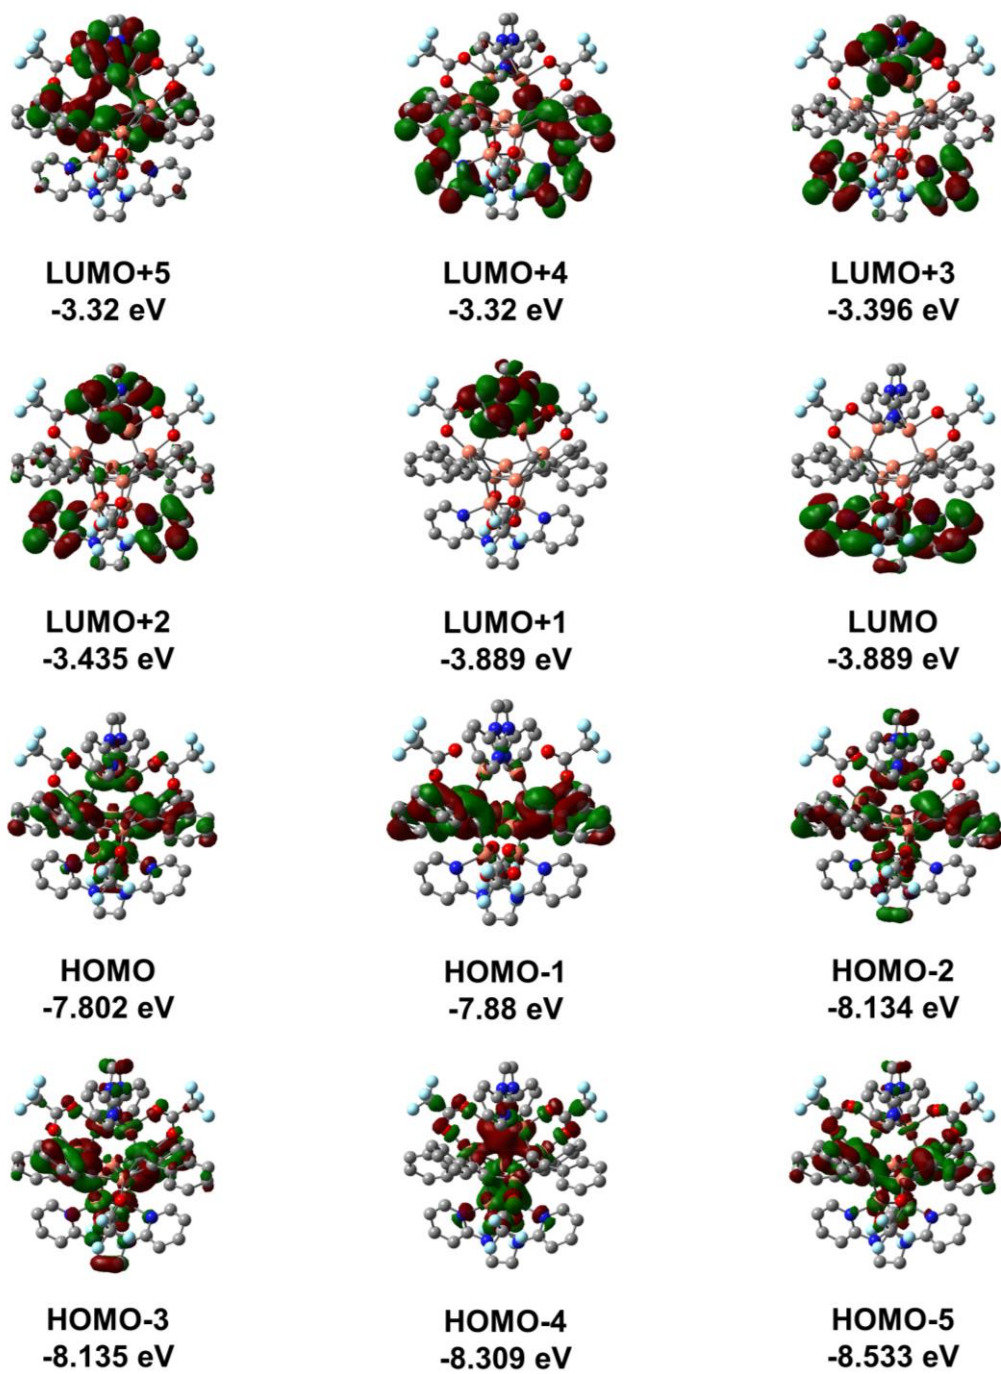

**Figure S17.** The frontier molecular orbital diagram of **Cu<sub>9</sub>-Ph**.

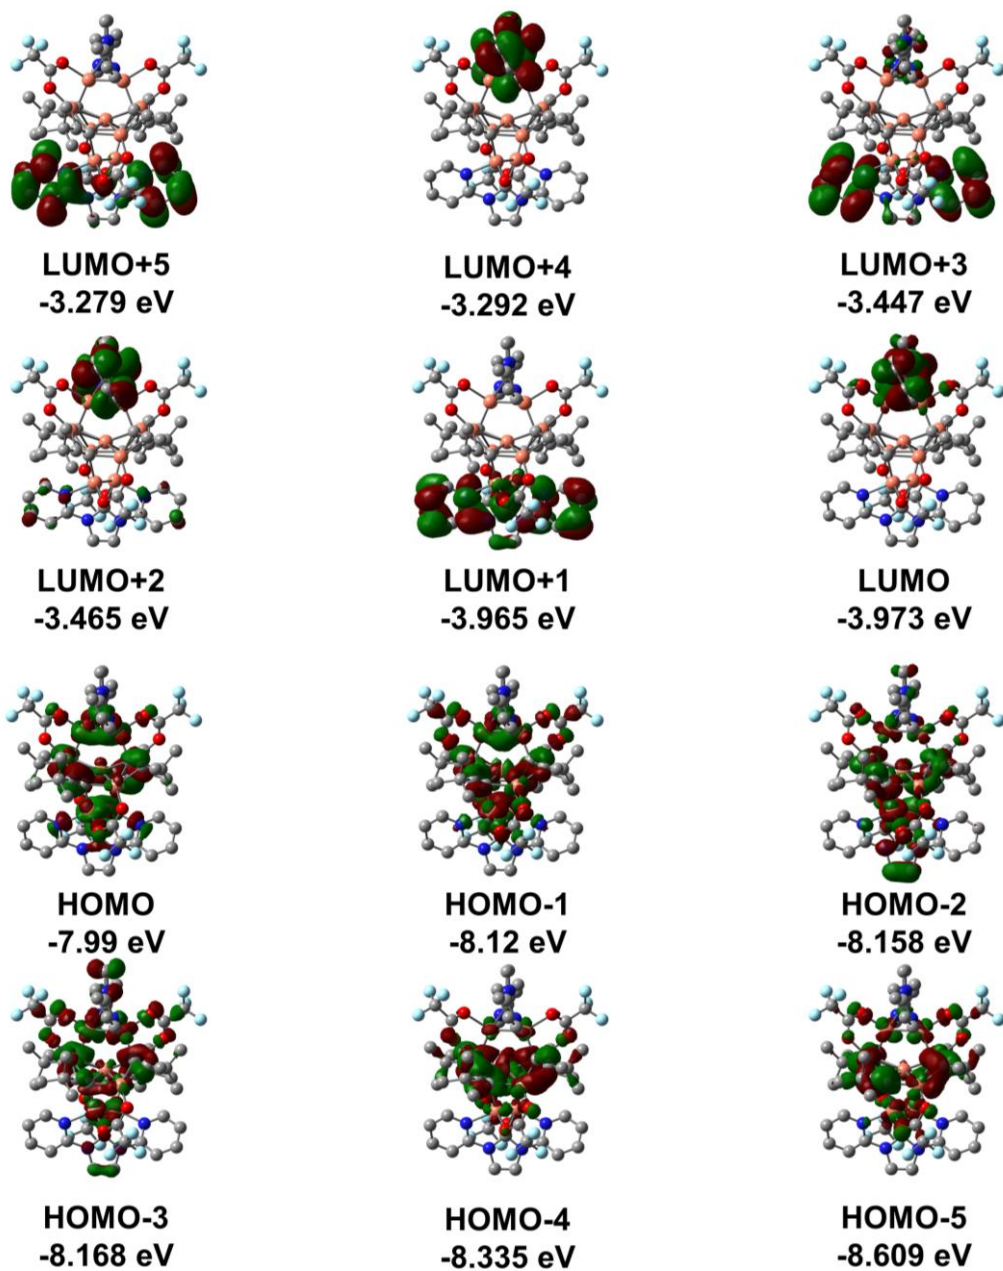

**Figure S18.** Frontier orbitals of the **Cu<sub>9</sub>-TBA** cluster.

**Table S1.** Calculated vertical/adiabatic excitation energy of S1 state of two copper clusters.

|                           | vertical excitation energy | adiabatic excitation energy |
|---------------------------|----------------------------|-----------------------------|
| <b>Cu<sub>9</sub>-Ph</b>  | 2.40 eV                    | 2.48 eV                     |
| <b>Cu<sub>9</sub>-TBA</b> | 1.89 eV                    | 2.30 eV                     |

**Table S2.** Crystallographic data and structure refinement parameters for **Cu<sub>9</sub>-Ph** and **Cu<sub>9</sub>-TBA**.

| <b>Compounds</b>                                    | <b>Cu<sub>9</sub>-Ph</b>                                                                                                          | <b>Cu<sub>9</sub>-TBA</b>                                                                                            |
|-----------------------------------------------------|-----------------------------------------------------------------------------------------------------------------------------------|----------------------------------------------------------------------------------------------------------------------|
| <b>Formula</b>                                      | C <sub>161</sub> H <sub>114</sub> N <sub>16</sub> O <sub>16</sub> F <sub>36</sub> P <sub>2</sub> Cl <sub>2</sub> Cu <sub>18</sub> | C <sub>65.3</sub> H <sub>64.6</sub> N <sub>8</sub> O <sub>8</sub> F <sub>18</sub> PCl <sub>0.6</sub> Cu <sub>9</sub> |
| <b>Crystal system</b>                               | orthorhombic                                                                                                                      | monoclinic                                                                                                           |
| <b>Space group</b>                                  | <i>Pbcn</i>                                                                                                                       | <i>P2<sub>1</sub>/c</i>                                                                                              |
| <b>Z</b>                                            | 4                                                                                                                                 | 4                                                                                                                    |
| <b>a (Å)</b>                                        | 26.0267(6)                                                                                                                        | 22.2619(3)                                                                                                           |
| <b>b (Å)</b>                                        | 26.6509(6)                                                                                                                        | 21.6279(5)                                                                                                           |
| <b>c (Å)</b>                                        | 23.8837(6)                                                                                                                        | 18.4909(4)                                                                                                           |
| <b>α (deg.)</b>                                     | 90                                                                                                                                | 90                                                                                                                   |
| <b>β (deg.)</b>                                     | 90                                                                                                                                | 108.627(2)                                                                                                           |
| <b>γ (deg.)</b>                                     | 90                                                                                                                                | 90                                                                                                                   |
| <b>V (Å<sup>3</sup>)</b>                            | 16566.6(7)                                                                                                                        | 8436.6(3)                                                                                                            |
| <b>Goodness-of-fit on F<sup>2</sup></b>             | 1.060                                                                                                                             | 1.043                                                                                                                |
| <b>R<sub>1</sub>, wR<sub>2</sub> (I &gt; 2σ(I))</b> | 0.0700, 0.1870                                                                                                                    | 0.0936, 0.2675                                                                                                       |
| <b>R<sub>1</sub>, wR<sub>2</sub> (all data)</b>     | 0.0825, 0.1940                                                                                                                    | 0.1304, 0.2829                                                                                                       |

**Table S3.** PL decay lifetime of **Cu<sub>9</sub>-Ph** and **Cu<sub>9</sub>-TBA** at 298 K in the solid state.

| Sample                    | A <sub>1</sub><br>(%) | τ <sub>1</sub><br>(μs) | A <sub>2</sub><br>(%) | τ <sub>2</sub><br>(μs) | A <sub>3</sub><br>(%) | τ <sub>3</sub><br>(μs) | τ <sub>ave</sub><br>(μs) |
|---------------------------|-----------------------|------------------------|-----------------------|------------------------|-----------------------|------------------------|--------------------------|
| <b>Cu<sub>9</sub>-Ph</b>  | 12.88                 | 4.73                   | 87.12                 | 18.4                   | -                     | -                      | 18.3                     |
| <b>Cu<sub>9</sub>-TBA</b> | 4.0                   | 3.38                   | 45.0                  | 9.31                   | 51.0                  | 14.2                   | 12.3                     |

**Table S4.** PL decay lifetime of **Cu<sub>9</sub>-Ph** and **Cu<sub>9</sub>-TBA** at 298 K in DCM.

| Sample                    | A <sub>1</sub><br>(%) | τ <sub>1</sub><br>(ns) | A <sub>2</sub><br>(%) | τ <sub>2</sub><br>(ns) | τ <sub>ave</sub><br>(ns) |
|---------------------------|-----------------------|------------------------|-----------------------|------------------------|--------------------------|
| <b>Cu<sub>9</sub>-Ph</b>  | 57.68                 | 5.23                   | 42.32                 | 763.61                 | 326                      |
| <b>Cu<sub>9</sub>-TBA</b> | 8.26                  | 7.25                   | 91.74                 | 669.26                 | 614                      |



Cartesian coordinates of the fully optimized  $S_0/S_1$  geometries of **Cu<sub>9</sub>-Ph** and **Cu<sub>9</sub>-TBA**

**Cu<sub>9</sub>-Ph**  $S_0$  state

Cu 0.00020000 0.00000000 -0.00020000  
Cu -2.43160000 0.14640000 -1.29180000  
Cu -2.43240000 -0.14470000 1.29180000  
Cu -0.82060000 2.23340000 -1.03210000  
Cu 0.82150000 1.03150000 2.23330000  
Cu 2.43280000 1.29040000 0.14650000  
Cu 2.43150000 -1.29320000 -0.14570000  
Cu 0.82120000 -1.03350000 -2.23320000  
Cu -0.82330000 -2.23300000 1.03130000  
C -0.64320000 -0.44240000 2.14140000  
C 0.64220000 -2.14270000 -0.44200000  
C 0.64370000 2.14110000 0.44230000  
C -0.64210000 0.44190000 -2.14160000  
O -3.62340000 1.61840000 -2.33090000  
N -3.27690000 -1.77690000 -1.90670000  
C -4.08020000 0.00260000 -0.00040000  
O -3.62550000 -1.61520000 2.33060000  
N -3.27410000 1.78020000 1.90650000  
O -2.13660000 3.29950000 -2.05670000  
C 0.15480000 3.30350000 0.50690000  
O 2.13820000 2.05540000 3.29940000  
C -0.15370000 -0.50770000 3.30350000  
O 3.62480000 2.32900000 1.61800000  
N 3.27700000 1.90470000 -1.77770000  
C 4.08030000 -0.00220000 0.00120000

O 3.62400000 -2.33190000 -1.61720000  
N 3.27420000 -1.90930000 1.77840000  
O 2.13760000 -2.05820000 -3.29880000  
C -0.15200000 0.50680000 -3.30350000  
O -2.14090000 -3.29800000 2.05500000  
C 0.15130000 -3.30430000 -0.50740000  
C -3.20020000 2.77340000 -2.48650000  
C -2.73520000 -2.75780000 -2.63120000  
C -4.43750000 -2.00870000 -1.29690000  
N -4.92370000 -0.91770000 -0.54150000  
N -4.92190000 0.92480000 0.54010000  
C -3.20360000 -2.77080000 2.48570000  
C -4.43370000 2.01470000 1.29580000  
C -2.73070000 2.75980000 2.63130000  
C -0.13670000 4.64860000 0.90820000  
C 3.20170000 2.48500000 2.77310000  
C 0.13860000 -0.90980000 4.64820000  
C 4.43730000 1.29440000 -2.01010000  
C 2.73510000 2.62940000 -2.75830000  
N 4.92220000 -0.54360000 0.92270000  
N 4.92360000 0.53860000 -0.91940000  
C 3.20110000 -2.48780000 -2.77240000  
C 2.73070000 -2.63400000 2.75810000  
C 4.43420000 -1.29920000 2.01260000  
C 0.14130000 0.90900000 -4.64790000  
C -0.14210000 -4.64870000 -0.90950000  
C -4.06180000 3.74430000 -3.31820000  
H -1.78390000 -2.52610000 -3.10200000  
C -3.34310000 -3.99810000 -2.78630000

C -5.12420000 -3.21360000 -1.37470000  
C -6.25080000 -0.57850000 -0.34190000  
C -6.24970000 0.58900000 0.33930000  
C -4.06570000 -3.74070000 3.31790000  
C -5.11750000 3.22130000 1.37280000  
C -3.33570000 4.00160000 2.78580000  
H -1.78030000 2.52590000 3.10290000  
C -0.98180000 5.47770000 0.15220000  
C 0.43820000 5.13970000 2.09590000  
C 4.06330000 3.31730000 3.74350000  
C -0.43580000 -2.09790000 5.13870000  
C 0.98390000 -0.15420000 5.47730000  
C 5.12330000 1.37190000 -3.21540000  
C 3.34240000 2.78430000 -3.99890000  
H 1.78410000 3.10060000 -2.52610000  
C 6.25000000 -0.34360000 0.58600000  
C 6.25080000 0.33800000 -0.58130000  
C 4.06300000 -3.31960000 -3.74290000  
H 1.78000000 -3.10500000 2.52440000  
C 3.33610000 -2.78910000 3.99960000  
C 5.11840000 -1.37700000 3.21890000  
C -0.43280000 2.09720000 -5.13880000  
C 0.98750000 0.15370000 -5.47640000  
C -0.98910000 -5.47670000 -0.15440000  
C 0.43260000 -5.14010000 -2.09710000  
F -3.35880000 4.20100000 -4.36480000  
F -5.17010000 3.17190000 -3.77910000  
F -4.41810000 4.79790000 -2.56780000  
H -2.86430000 -4.76860000 -3.38060000

C -4.55730000 -4.22410000 -2.14500000  
H -6.04810000 -3.37060000 -0.82830000  
H -7.07040000 -1.16900000 -0.72030000  
H -7.06810000 1.18140000 0.71700000  
F -3.36310000 -4.19650000 4.36520000  
F -5.17400000 -3.16770000 3.77790000  
F -4.42190000 -4.79510000 2.56850000  
H -6.04040000 3.38060000 0.82540000  
C -4.54870000 4.23060000 2.14340000  
H -2.85550000 4.77100000 3.38040000  
H -1.43420000 5.09340000 -0.75800000  
C -1.23960000 6.77560000 0.57830000  
C 0.16720000 6.43700000 2.51170000  
H 1.09150000 4.50080000 2.68220000  
F 5.17150000 3.77810000 3.17070000  
F 4.41990000 2.56760000 4.79750000  
F 3.36020000 4.36410000 4.19970000  
H -1.08950000 -2.68370000 4.49990000  
C -0.16410000 -2.51450000 6.43560000  
C 1.24260000 -0.58110000 6.77480000  
H 1.43610000 0.75630000 5.09340000  
H 6.04680000 0.82500000 -3.37300000  
C 4.55610000 2.14240000 -4.22560000  
H 2.86350000 3.37880000 -4.76910000  
H 7.06850000 -0.72210000 1.17780000  
H 7.07030000 0.71600000 -1.17210000  
F 5.17220000 -3.77860000 -3.17060000  
F 4.41790000 -2.57010000 -4.79760000  
F 3.36090000 -4.36750000 -4.19790000

H 2.85580000 -3.38350000 4.76910000  
C 4.54960000 -2.14750000 4.22820000  
H 6.04180000 -0.83030000 3.37790000  
H -1.08700000 2.68300000 -4.50040000  
C -0.16000000 2.51400000 -6.43540000  
C 1.24720000 0.58090000 -6.77360000  
H 1.43930000 -0.75690000 -5.09230000  
H -1.44140000 -5.09230000 0.75570000  
C -1.24890000 -6.77400000 -0.58150000  
C 0.15960000 -6.43670000 -2.51380000  
H 1.08740000 -4.50210000 -2.68260000  
H -5.05530000 -5.18530000 -2.22710000  
H -5.04440000 5.19310000 2.22490000  
H -1.88850000 7.41390000 -0.01490000  
C -0.66960000 7.25780000 1.75530000  
H 0.61980000 6.81110000 3.42570000  
H -0.61630000 -3.42890000 6.80940000  
C 0.67310000 -1.75860000 7.25650000  
H 1.89160000 0.01180000 7.41320000  
H 5.05370000 2.22430000 -5.18710000  
H 5.04570000 -2.22960000 5.19050000  
H -0.61200000 3.42830000 -6.80940000  
C 0.67800000 1.75830000 -7.25560000  
H 1.89690000 -0.01180000 -7.41150000  
H -1.89930000 -7.41150000 0.01100000  
C -0.67910000 -7.25640000 -1.75850000  
H 0.61200000 -6.81110000 -3.42780000  
H -0.87180000 8.27430000 2.08120000  
H 0.87590000 -2.08510000 8.27270000

H 0.88170000 2.08500000 -8.27160000

**Cu9-TBA S<sub>0</sub> state**

Cu 0.01740000 -0.01850000 -0.00280000

Cu 0.74240000 1.76340000 1.70540000

Cu 2.60790000 1.23340000 -0.13390000

Cu 2.56870000 -1.29140000 0.26190000

Cu 0.82460000 -1.75140000 -1.71710000

Cu -2.58170000 0.17630000 1.21420000

Cu -2.54670000 -0.24780000 -1.30640000

Cu -0.77400000 1.70210000 -1.73740000

Cu -0.79160000 -1.72920000 1.73740000

C -0.75920000 0.34640000 2.09120000

C -0.70270000 -0.36500000 -2.12770000

C 0.73190000 -2.13800000 0.34980000

C 0.78590000 2.09290000 -0.37360000

O 1.99970000 3.05120000 2.53790000

C -0.46140000 0.85340000 3.20430000

O 3.65180000 2.68690000 1.03770000

N 3.56510000 1.33780000 -2.13430000

C 4.26310000 -0.03950000 0.12280000

O 3.70290000 -2.69180000 -0.89150000

N 3.38280000 -1.41140000 2.32060000

O 2.19230000 -2.92320000 -2.55840000

C -0.34610000 -0.82430000 -3.24370000

O -3.68710000 -0.97160000 2.64510000

N -3.48380000 2.20030000 1.27050000

C -4.23890000 -0.06540000 -0.07020000

O -3.65880000 0.90700000 -2.72840000  
N -3.41420000 -2.28040000 -1.44390000  
O -2.14390000 2.57860000 -2.88070000  
C 0.47590000 3.20480000 -0.87450000  
O -2.11720000 -2.56960000 2.95270000  
C 0.38980000 -3.25280000 0.82330000  
C 3.13120000 3.24340000 2.01920000  
C -0.40000000 1.21590000 4.63940000  
C 4.73200000 0.70030000 -2.14290000  
C 3.11320000 1.84160000 -3.28270000  
N 5.07480000 -0.34590000 1.17490000  
N 5.14720000 0.22770000 -0.87980000  
C 3.29390000 -3.12240000 -1.98410000  
C 2.84330000 -1.90450000 3.43580000  
C 4.56780000 -0.81400000 2.40550000  
C -0.21820000 -1.12890000 -4.68750000  
C -3.23650000 -2.02200000 3.13350000  
C -4.65350000 2.22030000 0.63800000  
C -2.99950000 3.35240000 1.73560000  
N -5.07360000 -1.10430000 -0.35910000  
N -5.10000000 0.95660000 0.19650000  
C -3.24280000 2.01250000 -3.11630000  
C -2.90900000 -3.40130000 -1.95970000  
C -4.59640000 -2.34300000 -0.83770000  
C 0.39100000 4.64020000 -1.23310000  
C 0.28090000 -4.69350000 1.15060000  
C 3.96040000 4.32280000 2.74350000  
C -0.75940000 2.69940000 4.82020000  
C -1.41150000 0.33510000 5.39260000

C 1.01730000 0.97760000 5.17980000  
C 5.50350000 0.51310000 -3.28430000  
C 3.82580000 1.75490000 -4.47310000  
H 2.14710000 2.33490000 -3.22760000  
C 6.41560000 -0.27020000 0.83500000  
C 6.46090000 0.08970000 -0.46470000  
C 4.30280000 -3.96360000 -2.79190000  
H 1.86580000 -2.36360000 3.31970000  
C 3.48450000 -1.85120000 4.66800000  
C 5.27650000 -0.66700000 3.59300000  
C 1.20230000 -0.79620000 -5.16540000  
C -1.24590000 -0.26880000 -5.44300000  
C -0.49370000 -2.62010000 -4.93750000  
C -4.18310000 -2.82280000 4.05000000  
C -5.39800000 3.37430000 0.42200000  
C -3.68220000 4.55730000 1.61580000  
H -2.03240000 3.28980000 2.22620000  
C -6.40670000 -0.73790000 -0.27090000  
C -6.42290000 0.56570000 0.07760000  
C -4.23570000 2.85110000 -3.94630000  
H -1.93370000 -3.30280000 -2.42800000  
C -3.58110000 -4.61730000 -1.91730000  
C -5.33150000 -3.51500000 -0.69630000  
C 1.53910000 5.37780000 -0.52330000  
C 0.51020000 4.82120000 -2.75470000  
C -0.96010000 5.20200000 -0.76680000  
C -1.14460000 -5.18920000 0.86940000  
C 1.29030000 -5.45390000 0.27350000  
F 3.28400000 5.47780000 2.78440000



F 4.20380000 3.93840000 4.00570000  
F 5.13010000 4.54760000 2.14850000  
H -0.69100000 2.96070000 5.88230000  
H -1.78500000 2.89960000 4.49250000  
H -0.06590000 3.34110000 4.26580000  
H -1.16670000 -0.72690000 5.28490000  
H -2.42680000 0.49160000 5.01430000  
H -1.39470000 0.58860000 6.45880000  
H 1.74610000 1.59950000 4.65040000  
H 1.30510000 -0.07280000 5.07580000  
H 1.04700000 1.23700000 6.24440000  
H 6.41940000 -0.06690000 -3.25650000  
C 5.03670000 1.06880000 -4.47000000  
H 3.43320000 2.20240000 -5.37990000  
H 7.21070000 -0.50480000 1.52480000  
H 7.30370000 0.28500000 -1.10840000  
F 3.70070000 -4.81660000 -3.61980000  
F 5.05830000 -3.12850000 -3.53390000  
F 5.11870000 -4.65600000 -1.99760000  
H 3.02070000 -2.28980000 5.54510000  
C 4.71960000 -1.21390000 4.74350000  
H 6.21710000 -0.12770000 3.62460000  
H 1.94470000 -1.39420000 -4.62770000  
H 1.42500000 0.26420000 -5.01520000  
H 1.28660000 -1.01540000 -6.23610000  
H -1.05520000 0.79840000 -5.28650000  
H -2.26500000 -0.48560000 -5.10740000  
H -1.18010000 -0.47860000 -6.51680000  
H 0.21270000 -3.24770000 -4.38350000

H -0.37660000 -2.83520000 -6.00560000  
H -1.51800000 -2.88520000 -4.65460000  
F -4.68890000 -3.85730000 3.35260000  
F -5.20260000 -2.08630000 4.48790000  
F -3.53760000 -3.31570000 5.10940000  
H -6.31680000 3.35200000 -0.15340000  
C -4.89810000 4.56410000 0.93900000  
H -3.26220000 5.46720000 2.03070000  
H -7.21770000 -1.41410000 -0.48940000  
H -7.25070000 1.22740000 0.27720000  
F -3.61650000 3.68860000 -4.77760000  
F -4.98620000 3.58630000 -3.10010000  
F -5.05840000 2.08390000 -4.66020000  
H -3.14540000 -5.49930000 -2.37460000  
C -4.80900000 -4.67130000 -1.26430000  
H -6.26590000 -3.53130000 -0.14600000  
H 1.45950000 5.28230000 0.56400000  
H 1.50050000 6.44290000 -0.77920000  
H 2.51280000 4.98330000 -0.83160000  
H 1.48460000 4.47770000 -3.11860000  
H 0.42350000 5.88600000 -2.99900000  
H -0.28530000 4.28280000 -3.28010000  
H -1.78960000 4.67660000 -1.25050000  
H -1.02100000 6.26470000 -1.02830000  
H -1.06400000 5.11100000 0.31880000  
H -1.40310000 -5.05870000 -0.18530000  
H -1.87350000 -4.65000000 1.48250000  
H -1.21080000 -6.25700000 1.10820000  
H 1.23630000 -6.52540000 0.49820000

H 2.31270000 -5.11040000 0.46120000  
H 1.07270000 -5.31180000 -0.79050000  
H 5.61030000 0.95290000 -5.38450000  
H 5.24250000 -1.12920000 5.69120000  
H -5.44920000 5.48900000 0.79870000  
H -5.35370000 -5.60710000 -1.18490000  
C 0.60250000 -4.91910000 2.63660000  
H 0.49970000 -5.98480000 2.87040000  
H -0.09060000 -4.36170000 3.27630000

**Cu<sub>9</sub>-Ph S<sub>1</sub> state**

Cu -0.00380000 0.00000000 0.00000000  
Cu -2.47250000 0.54800000 -1.19640000  
Cu -2.47250000 -0.54800000 1.19650000  
Cu -0.91340000 2.40810000 -0.06580000  
Cu 0.80430000 0.17970000 2.44800000  
Cu 2.44160000 1.14740000 0.62470000  
Cu 2.44160000 -1.14730000 -0.62470000  
Cu 0.80420000 -0.17970000 -2.44790000  
Cu -0.91350000 -2.40800000 0.06570000  
C -0.63920000 -1.14940000 1.75100000  
C 0.66430000 -1.86700000 -1.20470000  
C 0.66440000 1.86700000 1.20470000  
C -0.63930000 1.14940000 -1.75100000  
O -3.54690000 2.36290000 -1.78890000  
N -3.19150000 -1.04600000 -2.29780000  
C -4.08320000 -0.00010000 0.00000000  
O -3.54680000 -2.36280000 1.78900000

N -3.19170000 1.04610000 2.29770000  
O -2.21650000 3.77240000 -0.62570000  
C 0.20900000 2.95320000 1.65860000  
O 2.12360000 0.66570000 3.83460000  
C -0.16490000 -1.65020000 2.81590000  
O 3.62110000 1.53970000 2.38410000  
N 3.28090000 2.44440000 -0.90510000  
C 4.08180000 0.00000000 0.00010000  
O 3.62110000 -1.53940000 -2.38420000  
N 3.28090000 -2.44450000 0.90510000  
O 2.12350000 -0.66560000 -3.83460000  
C -0.16510000 1.65020000 -2.81590000  
O -2.21660000 -3.77230000 0.62570000  
C 0.20900000 -2.95320000 -1.65850000  
C -3.20700000 3.46950000 -1.35430000  
C -2.64460000 -1.64800000 -3.36440000  
C -4.46850000 -1.34710000 -1.97080000  
N -4.93610000 -0.68410000 -0.85210000  
N -4.93630000 0.68370000 0.85210000  
C -3.20700000 -3.46940000 1.35440000  
C -4.46870000 1.34680000 1.97080000  
C -2.64490000 1.64830000 3.36420000  
C -0.02600000 4.12080000 2.45430000  
C 3.19380000 1.25160000 3.51270000  
C 0.09480000 -2.54400000 3.89750000  
C 4.43890000 1.97050000 -1.36010000  
C 2.73740000 3.49590000 -1.52070000  
N 4.92440000 -0.85070000 0.64710000  
N 4.92440000 0.85070000 -0.64700000

C 3.19380000 -1.25140000 -3.51280000  
C 2.73740000 -3.49600000 1.52070000  
C 4.43880000 -1.97060000 1.36010000  
C 0.09460000 2.54380000 -3.89770000  
C -0.02590000 -4.12080000 -2.45420000  
C -4.05480000 4.69390000 -1.75360000  
H -1.61760000 -1.36960000 -3.58390000  
C -3.32540000 -2.55980000 -4.14590000  
C -5.23140000 -2.26450000 -2.70150000  
C -6.25800000 -0.42280000 -0.52570000  
C -6.25810000 0.42190000 0.52590000  
C -4.05480000 -4.69380000 1.75370000  
C -5.23190000 2.26420000 2.70140000  
C -3.32590000 2.56000000 4.14570000  
H -1.61780000 1.37010000 3.58380000  
C -0.90370000 5.13450000 2.03490000  
C 0.64730000 4.24640000 3.68480000  
C 4.05300000 1.65710000 4.72660000  
C -0.46790000 -3.83650000 3.85560000  
C 0.89600000 -2.16670000 4.99090000  
C 5.12170000 2.51090000 -2.44210000  
C 3.34310000 4.12190000 -2.60380000  
H 1.78990000 3.84010000 -1.11570000  
C 6.25170000 -0.53700000 0.41050000  
C 6.25170000 0.53690000 -0.41030000  
C 4.05300000 -1.65670000 -4.72670000  
H 1.78990000 -3.84020000 1.11560000  
C 3.34300000 -4.12200000 2.60370000  
C 5.12160000 -2.51100000 2.44220000

C -0.46810000 3.83640000 -3.85570000  
C 0.89560000 2.16650000 -4.99110000  
C -0.90370000 -5.13450000 -2.03480000  
C 0.64750000 -4.24670000 -3.68460000  
F -3.32520000 5.50350000 -2.54160000  
F -5.15570000 4.35360000 -2.41480000  
F -4.41420000 5.39120000 -0.66910000  
H -2.83610000 -3.02420000 -4.99420000  
C -4.65190000 -2.87090000 -3.79930000  
H -6.24320000 -2.51020000 -2.39720000  
H -7.08750000 -0.82900000 -1.08230000  
H -7.08770000 0.82790000 1.08260000  
F -3.32530000 -5.50340000 2.54160000  
F -5.15570000 -4.35340000 2.41490000  
F -4.41430000 -5.39110000 0.66920000  
H -6.24370000 2.50970000 2.39710000  
C -4.65240000 2.87080000 3.79910000  
H -2.83660000 3.02460000 4.99390000  
H -1.43770000 5.02900000 1.09460000  
C -1.09250000 6.25660000 2.83250000  
C 0.44330000 5.37070000 4.47300000  
H 1.31960000 3.46130000 4.01580000  
F 5.19580000 2.23480000 4.36780000  
F 4.34520000 0.57800000 5.46630000  
F 3.37120000 2.51690000 5.49750000  
H -1.08190000 -4.12830000 3.00980000  
C -0.23180000 -4.72580000 4.89380000  
C 1.12030000 -3.06770000 6.02340000  
H 1.34000000 -1.17530000 5.01230000

H 6.04360000 2.06800000 -2.80340000  
C 4.55380000 3.61640000 -3.06800000  
H 2.86720000 4.97410000 -3.07640000  
H 7.07070000 -1.11170000 0.81350000  
H 7.07070000 1.11160000 -0.81340000  
F 5.19600000 -2.23410000 -4.36790000  
F 4.34480000 -0.57770000 -5.46660000  
F 3.37130000 -2.51690000 -5.49740000  
H 2.86710000 -4.97420000 3.07630000  
C 4.55370000 -3.61660000 3.06800000  
H 6.04350000 -2.06800000 2.80350000  
H -1.08200000 4.12820000 -3.00990000  
C -0.23210000 4.72560000 -4.89410000  
C 1.11990000 3.06750000 -6.02370000  
H 1.33970000 1.17510000 -5.01250000  
H -1.43790000 -5.02890000 -1.09460000  
C -1.09250000 -6.25670000 -2.83230000  
C 0.44360000 -5.37100000 -4.47270000  
H 1.32000000 -3.46150000 -4.01560000  
H -5.21870000 -3.59140000 -4.38050000  
H -5.21940000 3.59130000 4.38020000  
H -1.77020000 7.03860000 2.50230000  
C -0.42310000 6.37820000 4.04870000  
H 0.96690000 5.46230000 5.42030000  
H -0.67620000 -5.71630000 4.86160000  
C 0.55910000 -4.34400000 5.97900000  
H 1.73330000 -2.77110000 6.86970000  
H 5.05010000 4.06770000 -3.92170000  
H 5.05000000 -4.06780000 3.92170000

H -0.67650000 5.71620000 -4.86180000  
C 0.55870000 4.34380000 -5.97920000  
H 1.73280000 2.77080000 -6.87000000  
H -1.77030000 -7.03860000 -2.50210000  
C -0.42290000 -6.37840000 -4.04850000  
H 0.96730000 -5.46270000 -5.41990000  
H -0.57570000 7.25800000 4.66750000  
H 0.73340000 -5.04160000 6.79340000  
H 0.73290000 5.04140000 -6.79380000  
H -0.57550000 -7.25820000 -4.66720000

**Cu<sub>9</sub>-TBA S<sub>1</sub> state**

Cu 0.18580000 0.17430000 0.00930000  
Cu -1.02200000 0.94570000 -2.07120000  
Cu -2.71520000 1.06900000 -0.08090000  
Cu -2.59810000 -1.66270000 0.27170000  
Cu -0.36340000 -1.33630000 2.16020000  
Cu 2.41550000 -0.07830000 -1.50960000  
Cu 2.68450000 0.50770000 0.98110000  
Cu 0.63220000 2.35070000 1.18950000  
Cu 0.78810000 -2.21810000 -0.66230000  
C 0.43260000 -0.55860000 -1.92050000  
C 0.90070000 0.33490000 1.95990000  
C -0.85390000 -2.60690000 0.61140000  
C -0.92540000 2.04710000 -0.21800000  
O -2.26650000 1.93340000 -3.23480000  
C 0.09000000 -0.58210000 -3.13160000  
O -3.86910000 1.96510000 -1.64260000



N -3.86900000 1.38650000 1.64100000  
C -4.30360000 -0.66930000 -0.18880000  
O -3.21620000 -1.58180000 2.30940000  
N -2.93690000 -2.34740000 -1.65390000  
O -1.48730000 -2.17230000 3.63060000  
C 0.69930000 0.22410000 3.19730000  
O 3.46720000 -1.62650000 -2.47840000  
N 2.80170000 1.95220000 -2.40470000  
C 4.16650000 0.52320000 -0.50760000  
O 3.65180000 2.17990000 1.86920000  
N 3.97180000 -1.18370000 1.61810000  
O 1.89570000 3.59290000 2.04280000  
C -0.82590000 3.29100000 -0.05470000  
O 2.41740000 -3.22200000 -1.26720000  
C -0.23150000 -3.69490000 0.62880000  
C -3.39950000 2.22250000 -2.76310000  
C -0.03220000 -0.86270000 -4.58010000  
C -5.09680000 0.86770000 1.53220000  
C -3.58350000 2.12740000 2.71490000  
N -4.87260000 -1.14540000 -1.33980000  
N -5.30130000 0.08050000 0.39800000  
C -2.70040000 -2.04870000 3.34910000  
C -2.25490000 -3.32950000 -2.28900000  
C -4.20380000 -2.08800000 -2.10170000  
C 0.69570000 0.40290000 4.66660000  
C 3.27600000 -2.78840000 -2.07750000  
C 3.98070000 2.42270000 -2.00440000  
C 2.01960000 2.75770000 -3.12630000  
N 5.23410000 -0.17590000 -0.02960000

N 4.74630000 1.51270000 -1.24280000  
C 3.10220000 3.25410000 2.16920000  
C 3.75420000 -2.15380000 2.50680000  
C 5.07860000 -1.24400000 0.88190000  
C -0.97650000 4.76270000 -0.07290000  
C 0.23370000 -5.07730000 0.85620000  
C -4.30400000 2.98050000 -3.75420000  
C 0.72240000 0.22250000 -5.36680000  
C 0.61540000 -2.23240000 -4.85060000  
C -1.50470000 -0.86690000 -5.01690000  
C -6.10100000 1.08440000 2.47520000  
C -4.51270000 2.40380000 3.70670000  
H -2.57080000 2.51880000 2.75790000  
C -6.18350000 -0.70590000 -1.46010000  
C -6.44410000 0.05800000 -0.37580000  
C -3.68410000 -2.44950000 4.46770000  
H -1.25870000 -3.52190000 -1.90620000  
C -2.75380000 -4.03980000 -3.35360000  
C -4.78310000 -2.76320000 -3.17560000  
C -0.69770000 0.84870000 5.13700000  
C 1.72950000 1.49520000 4.99670000  
C 1.07720000 -0.90880000 5.37080000  
C 4.25130000 -3.86770000 -2.59160000  
C 4.44890000 3.69820000 -2.29940000  
C 2.40350000 4.03720000 -3.51010000  
H 1.05600000 2.34830000 -3.41500000  
C 6.43690000 0.36290000 -0.45390000  
C 6.12890000 1.43250000 -1.21900000  
C 4.02310000 4.36150000 2.71930000

H 2.83180000 -2.07150000 3.07460000  
C 4.64510000 -3.20070000 2.71160000  
C 6.02040000 -2.26100000 0.98170000  
C -2.12160000 5.11650000 -1.03680000  
C -1.30820000 5.25950000 1.34420000  
C 0.33370000 5.41310000 -0.54310000  
C 1.59990000 -5.04740000 1.55890000  
C -0.80570000 -5.76980000 1.75570000  
F -3.66090000 4.03890000 -4.26280000  
F -4.63870000 2.16940000 -4.76850000  
F -5.42590000 3.41300000 -3.18180000  
H 0.69760000 -0.02950000 -6.43280000  
H 1.76990000 0.29000000 -5.05390000  
H 0.24150000 1.19900000 -5.24460000  
H 0.09640000 -3.02570000 -4.30340000  
H 1.66980000 -2.22950000 -4.55770000  
H 0.55200000 -2.45720000 -5.92110000  
H -1.96960000 0.10770000 -4.83990000  
H -2.07560000 -1.63150000 -4.48400000  
H -1.55610000 -1.08760000 -6.08940000  
H -7.07270000 0.61510000 2.36470000  
C -5.79730000 1.87260000 3.57450000  
H -4.23890000 3.01580000 4.55900000  
H -6.81160000 -0.94350000 -2.30320000  
H -7.32360000 0.63080000 -0.12490000  
F -3.24910000 -3.51350000 5.14070000  
F -3.79060000 -1.42220000 5.32980000  
F -4.89880000 -2.71840000 3.99270000  
H -2.14330000 -4.80090000 -3.82770000

C -4.05930000 -3.74960000 -3.81730000  
H -5.79490000 -2.52850000 -3.48930000  
H -1.44790000 0.07870000 4.94100000  
H -0.99900000 1.77870000 4.64380000  
H -0.66830000 1.03100000 6.21710000  
H 1.46010000 2.44810000 4.53060000  
H 2.72940000 1.21210000 4.65200000  
H 1.76430000 1.63800000 6.08260000  
H 0.36730000 -1.70590000 5.13110000  
H 1.06340000 -0.75070000 6.45490000  
H 2.08920000 -1.22440000 5.09440000  
F 5.16510000 -4.12480000 -1.63520000  
F 4.90110000 -3.47970000 -3.68540000  
F 3.61130000 -5.00800000 -2.86420000  
H 5.39680000 4.05280000 -1.90920000  
C 3.64030000 4.51260000 -3.08410000  
H 1.74380000 4.64350000 -4.12190000  
H 7.39540000 -0.03410000 -0.15900000  
H 6.76630000 2.11200000 -1.76220000  
F 3.39040000 5.14320000 3.59390000  
F 4.43260000 5.12920000 1.69240000  
F 5.10410000 3.85710000 3.31260000  
H 4.43530000 -3.95910000 3.45810000  
C 5.79470000 -3.25260000 1.92940000  
H 6.88140000 -2.29810000 0.32360000  
H -1.89830000 4.78720000 -2.05660000  
H -2.26300000 6.20320000 -1.04870000  
H -3.05990000 4.64820000 -0.72310000  
H -2.24310000 4.81930000 1.70780000

H -1.43100000 6.34830000 1.32750000  
H -0.50050000 5.01770000 2.04390000  
H 1.15610000 5.17430000 0.13890000  
H 0.20790000 6.50160000 -0.56650000  
H 0.59920000 5.07700000 -1.55020000  
H 1.53210000 -4.52950000 2.52240000  
H 2.34800000 -4.55270000 0.93270000  
H 1.92760000 -6.07610000 1.74670000  
H -0.48380000 -6.79780000 1.95630000  
H -1.78590000 -5.80550000 1.26910000  
H -0.91270000 -5.24470000 2.71030000  
H -6.55070000 2.05510000 4.33480000  
H -4.49110000 -4.29430000 -4.64960000  
H 3.96950000 5.51400000 -3.34410000  
H 6.50490000 -4.06610000 2.04140000  
C 0.36000000 -5.81710000 -0.48520000  
H 0.67200000 -6.85020000 -0.29530000  
H 1.10930000 -5.34100000 -1.12490000  
H -0.60040000 -5.84770000 -1.01120000
